# Supplementary material for: Treatment outcome in a population-based, ‘real-world’ cohort of patients with chronic myeloid leukemia
Source: PubMed Central journal article supplement — Haematologica. 2017 Aug 31;102(11):1842–9. doi: 10.3324/haematol.2017.174953 (PMC5664388; doi:10.3324/haematol.2017.174953), 2017-11
Supplement: 2017.174953.GEELEN_SUPPL.pdf [file 2017.174953.GEELEN_SUPPL.pdf]

## Treatment outcome in a population-based, ‘real-world’ cohort of patients with chronic myeloid leukemia

Inge G.P. Geelen,<sup>1</sup> Noortje Thielen,<sup>2,3</sup> Jeroen J.W.M. Janssen,<sup>2</sup> Mels Hoogendoorn,<sup>4</sup> Tanja J.A. Roosma,<sup>2</sup> Sten P. Willemsen,<sup>5,6</sup> Otto Visser,<sup>7</sup> Jan J. Cornelissen<sup>8</sup> and Peter E. Westerweel<sup>1</sup>

<sup>1</sup>Department of Hematology, Albert Schweitzer Hospital, Dordrecht; <sup>2</sup>Department of Hematology, VU University Medical Center, Amsterdam; <sup>3</sup>Department of Internal Medicine, Diaconessenhuis, Utrecht; <sup>4</sup>Department of Hematology, Medical Center Leeuwarden; <sup>5</sup>Department of Biostatistics, Albert Schweitzer Hospital, Dordrecht; <sup>6</sup>Department of Biostatistics, Erasmus University Medical Center, Rotterdam; <sup>7</sup>Netherlands Comprehensive Cancer Organisation (IKNL), Utrecht and <sup>8</sup>Department of Hematology, Erasmus University Medical Center, Rotterdam, the Netherlands

©2017 Ferrata Storti Foundation. This is an open-access paper. doi:10.3324/haematol.2017.174953

Received: June 21, 2017.

Accepted: August 24, 2017.

Pre-published: August 31, 2017.

Correspondence: p.e.westerweel@asz.nl

---

## Supplementary information

### Treatment outcome in a population based 'real-world' cohort of chronic myeloid leukemia patients

Inge G.P. Geelen<sup>1</sup>, Noortje Thielen<sup>2,3</sup>, Jeroen J.W.M. Janssen<sup>2</sup>, Mels Hoogendoorn<sup>4</sup>, Tanja J.A. Roosma<sup>2</sup>, Sten P. Willemsen<sup>5,6</sup>, Otto Visser<sup>7</sup>, Jan J. Cornelissen<sup>8</sup> and Peter E. Westerweel<sup>1</sup>

(1) Dep. of Hematology, Albert Schweitzer Hospital, Dordrecht, the Netherlands

(2) Dep. of Hematology, VU University Medical Center, Amsterdam, the Netherlands

(3) Dep. of Internal Medicine, Diakonessenhuis, Utrecht, the Netherlands

(4) Dep. of Hematology, Medical Center Leeuwarden, Leeuwarden, the Netherlands

(5) Dep. of Biostatistics, Albert Schweitzer Hospital, Dordrecht, the Netherlands

(6) Dep. of Biostatistics, Erasmus University Medical Center, Rotterdam, the Netherlands

(7) Netherlands Comprehensive Cancer Organisation (IKNL), Utrecht, the Netherlands

(8) Dep. of Hematology, Erasmus University Medical Center, Rotterdam, the Netherlands

#### Corresponding author:

Dr. Peter E. Westerweel

Department of Interne Medicine / Hematology

Albert Schweitzer Hospital, P.O. Box 444, 3300 AK Dordrecht, The Netherlands

Phone: +31 78-6546464

Fax: +31 78-6523377

E-mail: p.e.westerweel@asz.nl

## **Supplementary results**

### TKI intolerance

Considering all treatment lines for analysis, side effects were reported in 177/305 patients treated with imatinib (58%), 58/139 patients treated with nilotinib (42%) and 61/116 patients treated with dasatinib (53%) in any line. Cytopenia (in particular thrombocytopenia), fatigue and infections were reported frequently (>5%) during all three forms of treatment (supplemental table S2). Gastrointestinal complaints (in particular diarrhea) were far more common in patients treated with imatinib and dasatinib, whereas rash was more often observed during imatinib and nilotinib treatment. Imatinib showed high rates of fluid retention (both superficial and periorbital) and musculoskeletal symptoms, while pleural effusion was observed frequently during dasatinib treatment. Lastly, cardiovascular events were observed at a high rate (5.8%) during nilotinib treatment. Actions following the different adverse events are shown in supplemental table S2.

## Supplementary tables

**SI table S1.** Events, competing risks and censors per cumulative incidence competing risk analysis.

| Analysis                                         | Event                                                                 | Competing risk                                                                                           | Censor                                                       |
|--------------------------------------------------|-----------------------------------------------------------------------|----------------------------------------------------------------------------------------------------------|--------------------------------------------------------------|
| Time to CCyR (Overall)                           | First CCyR                                                            | - Death<br>- Progression                                                                                 | - End of follow up without event or competing risk           |
| Time to CCyR (On initial treatment)              | First CCyR on first line treatment                                    | - Death<br>- Progression<br>- First line TKI discontinuation without CCyR achievement                    | - End of follow up without event or competing risk           |
| Time to MMR (Overall)                            | First MMR                                                             | - Death<br>- Progression                                                                                 | - End of follow up without event or competing risk           |
| Time to MMR (On initial treatment)               | First MMR on first line treatment                                     | - Death<br>- Progression<br>- First line TKI discontinuation without MMR achievement                     | - End of follow up without event or competing risk           |
| Time to MR <sup>4.0</sup> (Overall)              | First MR <sup>4.0</sup>                                               | - Death<br>- Progression                                                                                 | - End of follow up without event or competing risk           |
| Time to MR <sup>4.0</sup> (On initial treatment) | First MR <sup>4.0</sup> on first line treatment                       | - Death<br>- Progression<br>- First line TKI discontinuation without MR4.0 achievement                   | - End of follow up without event or competing risk           |
| Time to MR <sup>4.5</sup> (Overall)              | First MR <sup>4.5</sup>                                               | - Death<br>- Progression                                                                                 | - End of follow up without event or competing risk           |
| Time to MR <sup>4.5</sup> (On initial treatment) | First MR <sup>4.5</sup> on first line treatment                       | - Death<br>- Progression<br>- First line TKI discontinuation without MR4.5 achievement                   | - End of follow up without event or competing risk           |
| All cause TKI discontinuation                    | First line TKI discontinuation                                        | - Death                                                                                                  | - End of follow up without event or competing risk           |
| TKI discontinuation due to failure               | First line TKI discontinuation due to reported failure                | - Death<br>- TKI discontinuation due to all other reasons                                                | - End of follow up without event or competing risk           |
| TKI discontinuation due to intolerance           | First line TKI discontinuation due to reported intolerance            | - Death<br>- TKI discontinuation due to all other reasons                                                | - End of follow up without event or competing risk           |
| Effective and tolerable first line treatment     | First line TKI continuation at least one year after achieving MMR     | - Death<br>- Progression<br>- HSCT                                                                       | - End of follow up without event or competing risk           |
| CML-related death                                | Death proceeded by CML progression                                    | - Death due to all other causes                                                                          | - End of follow up without event or competing risk<br>- HSCT |
| TKI stop eligibility                             | Eligibility for a TKI stop attempt according to the EURO-SKI criteria | - Death<br>- Progression<br>- First line TKI failure<br>- Less than 3 years on first and second line TKI | - End of follow up without event or competing risk           |

Abbr: CCyR, complete cytogenetic response; MMR, major molecular response; MR<sup>4.0</sup>, BCR-ABL1 0.01% on international scale;

MR<sup>4.5</sup>, BCR-ABL1 0.0032% on international scale; TKI, tyrosine kinase inhibitor; HSCT, hematopoietic stem cell transplantation

**SI table S2. Adverse events per TKI and actions taken on the adverse events**

|                                       | Imatinib<br>n=305 |             | Nilotinib<br>n=139 |             | Dasatinib<br>n=116 |             | No action |     | Interruption |    | Reduction |     | Switch |     | Stop |    | Unknown |     |
|---------------------------------------|-------------------|-------------|--------------------|-------------|--------------------|-------------|-----------|-----|--------------|----|-----------|-----|--------|-----|------|----|---------|-----|
|                                       | n                 | %           | n                  | %           | n                  | %           | n         | %   | n            | %  | n         | %   | n      | %   | n    | %  | n       | %   |
| <b>Hematologic adverse events</b>     | <b>67</b>         | <b>22,0</b> | <b>20</b>          | <b>14,4</b> | <b>23</b>          | <b>19,8</b> |           |     |              |    |           |     |        |     |      |    |         |     |
| Thrombocytopenia*                     | 30                | 9,8         | 14                 | 10,1        | 12                 | 10,3        | 19        | 33  | 9            | 16 | 18        | 32  | 7      | 12  | 1    | 2  | 3       | 5   |
| Leukopenia*                           | 15                | 4,9         | 0                  | 0,0         | 2                  | 1,7         | 9         | 50  | 3            | 17 | 5         | 28  | 1      | 6   | 0    | 0  | 0       | 0   |
| Anemia*                               | 13                | 4,3         | 4                  | 2,9         | 2                  | 1,7         | 7         | 37  | 1            | 5  | 7         | 37  | 2      | 11  | 1    | 5  | 1       | 5   |
| Pancytopenia*                         | 9                 | 3,0         | 2                  | 1,4         | 7                  | 6,0         | 2         | 11  | 2            | 11 | 6         | 33  | 6      | 33  | 2    | 11 | 0       | 0   |
| <b>Biochemical adverse events</b>     | <b>9</b>          | <b>3,0</b>  | <b>7</b>           | <b>5,0</b>  | <b>6</b>           | <b>5,2</b>  |           |     |              |    |           |     |        |     |      |    |         |     |
| Elevated serum creatinine             | 6                 | 2,0         | 0                  | 0,0         | 2                  | 1,7         | 6         | 75  | 0            | 0  | 1         | 13  | 1      | 13  | 0    | 0  | 0       | 0   |
| Elevated serum ALAT                   | 2                 | 0,7         | 2                  | 1,4         | 1                  | 0,9         | 1         | 20  | 2            | 40 | 2         | 40  | 0      | 0   | 0    | 0  | 0       | 0   |
| Elevated serum bilirubine             | 0                 | 0,0         | 2                  | 1,4         | 0                  | 0,0         | 0         | 0   | 1            | 50 | 0         | 00  | 1      | 50  | 0    | 0  | 0       | 0   |
| Elevated serum GGT                    | 0                 | 0,0         | 0                  | 0,0         | 2                  | 1,7         | 1         | 50  | 0            | 0  | 0         | 0   | 0      | 0   | 0    | 0  | 1       | 50  |
| Elevated serum amylase                | 0                 | 0,0         | 0                  | 0,0         | 1                  | 0,9         | 1         | 100 | 0            | 0  | 0         | 0   | 0      | 0   | 0    | 0  | 0       | 0   |
| Elevated serum ASAT                   | 1                 | 0,3         | 1                  | 0,7         | 0                  | 0,0         | 0         | 0   | 0            | 0  | 1         | 50  | 0      | 0   | 0    | 0  | 1       | 50  |
| Elevated serum lipase                 | 0                 | 0,0         | 1                  | 0,7         | 0                  | 0,0         | 1         | 100 | 0            | 0  | 0         | 0   | 0      | 0   | 0    | 0  | 0       | 0   |
| Electrolyte disorders                 | 0                 | 0,0         | 1                  | 0,7         | 0                  | 0,0         | 1         | 100 | 0            | 0  | 0         | 0   | 0      | 0   | 0    | 0  | 0       | 0   |
| Hypoalbuminemia                       | 0                 | 0,0         | 0                  | 0,0         | 0                  | 0,0         | 0         | 0   | 0            | 0  | 0         | 0   | 0      | 0   | 0    | 0  | 0       | 0   |
| <b>Nonhematologic</b>                 |                   |             |                    |             |                    |             |           |     |              |    |           |     |        |     |      |    |         |     |
| <b>Gastrointestinal complains</b>     | <b>63</b>         | <b>20,7</b> | <b>5</b>           | <b>3,6</b>  | <b>20</b>          | <b>17,2</b> |           |     |              |    |           |     |        |     |      |    |         |     |
| Diarrhea                              | 28                | 9,2         | 2                  | 1,4         | 11                 | 9,5         | 6         | 14  | 6            | 14 | 12        | 28  | 18     | 42  | 0    | 0  | 1       | 2   |
| Nausea                                | 15                | 4,9         | 1                  | 0,7         | 5                  | 4,3         | 2         | 10  | 0            | 0  | 10        | 48  | 9      | 43  | 0    | 0  | 0       | 0   |
| Vomiting                              | 13                | 4,3         | 1                  | 0,7         | 3                  | 2,6         | 4         | 22  | 1            | 6  | 4         | 22  | 8      | 44  | 0    | 0  | 1       | 6   |
| Abdominal discomfort                  | 6                 | 2,0         | 1                  | 0,7         | 1                  | 0,9         | 1         | 13  | 0            | 0  | 1         | 13  | 6      | 75  | 0    | 0  | 0       | 0   |
| Pancreatitis                          | 1                 | 0,3         | 0                  | 0,0         | 0                  | 0,0         | 1         | 100 | 0            | 0  | 0         | 0   | 0      | 0   | 0    | 0  | 0       | 0   |
| <b>Pulmonary</b>                      | <b>8</b>          | <b>2,6</b>  | <b>8</b>           | <b>5,8</b>  | <b>21</b>          | <b>18,1</b> |           |     |              |    |           |     |        |     |      |    |         |     |
| Pleural effusion                      | 2                 | 0,7         | 3                  | 2,2         | 16                 | 13,8        | 0         | 0   | 3            | 14 | 2         | 10  | 14     | 67  | 2    | 10 | 0       | 0   |
| Dyspnea                               | 5                 | 1,6         | 4                  | 2,9         | 4                  | 3,4         | 3         | 21  | 0            | 0  | 4         | 29  | 5      | 36  | 2    | 14 | 0       | 0   |
| Pleuritis                             | 1                 | 0,3         | 0                  | 0,0         | 1                  | 0,9         | 0         | 0   | 0            | 0  | 0         | 0   | 1      | 50  | 1    | 50 | 0       | 0   |
| Pulmonary hypertension                | 0                 | 0,0         | 1                  | 0,7         | 0                  | 0,0         | 1         | 100 | 0            | 0  | 0         | 0   | 0      | 0   | 0    | 0  | 0       | 0   |
| <b>Fluid retention</b>                | <b>38</b>         | <b>12,5</b> | <b>7</b>           | <b>5,0</b>  | <b>4</b>           | <b>3,4</b>  |           |     |              |    |           |     |        |     |      |    |         |     |
| Superficial edema                     | 18                | 5,9         | 5                  | 3,6         | 3                  | 2,6         | 3         | 12  | 0            | 0  | 12        | 46  | 10     | 39  | 1    | 4  | 0       | 0   |
| Periorbital edema (+eyelid edema)     | 16                | 5,2         | 2                  | 1,4         | 1                  | 0,9         | 2         | 10  | 1            | 5  | 4         | 19  | 12     | 57  | 1    | 5  | 1       | 5   |
| Macular edema                         | 4                 | 1,3         | 0                  | 0,0         | 0                  | 0,0         | 1         | 25  | 0            | 0  | 0         | 0   | 3      | 75  | 0    | 0  | 0       | 0   |
| <b>Musculoskeletal</b>                | <b>30</b>         | <b>9,8</b>  | <b>5</b>           | <b>3,6</b>  | <b>5</b>           | <b>4,3</b>  |           |     |              |    |           |     |        |     |      |    |         |     |
| Myalgia                               | 11                | 3,6         | 2                  | 1,4         | 3                  | 2,6         | 1         | 6   | 1            | 6  | 10        | 63  | 3      | 19  | 1    | 6  | 0       | 0   |
| Muscle cramps                         | 10                | 3,3         | 1                  | 0,7         | 1                  | 0,9         | 4         | 29  | 1            | 7  | 6         | 43  | 3      | 21  | 0    | 0  | 0       | 0   |
| Musculoskeletal pain                  | 8                 | 2,6         | 2                  | 1,4         | 1                  | 0,9         | 1         | 9   | 0            | 0  | 4         | 36  | 4      | 36  | 2    | 18 | 0       | 0   |
| Gout                                  | 1                 | 0,3         | 0                  | 0,0         | 0                  | 0,0         | 1         | 100 | 0            | 0  | 0         | 0   | 0      | 0   | 0    | 0  | 0       | 0   |
| <b>Cardiovascular events</b>          | <b>4</b>          | <b>1,3</b>  | <b>8</b>           | <b>5,8</b>  | <b>1</b>           | <b>0,9</b>  |           |     |              |    |           |     |        |     |      |    |         |     |
| Ischemic heart disease                | 1                 | 0,3         | 3                  | 2,2         | 1                  | 0,9         | 3         | 60  | 0            | 0  | 0         | 0   | 2      | 40  | 0    | 0  | 0       | 0   |
| Cerebro vascular event                | 0                 | 0,0         | 2                  | 1,4         | 0                  | 0,0         | 2         | 100 | 0            | 0  | 0         | 0   | 0      | 0   | 0    | 0  | 0       | 0   |
| Peripheral arterial occlusive disease | 2                 | 0,7         | 2                  | 1,4         | 0                  | 0,0         | 1         | 25  | 0            | 0  | 1         | 25  | 2      | 50  | 0    | 0  | 0       | 0   |
| Venous thromboembolic event           | 1                 | 0,3         | 1                  | 0,7         | 0                  | 0,0         | 1         | 50  | 0            | 0  | 0         | 0   | 1      | 50  | 0    | 0  | 0       | 0   |
| <b>Non-ischemic cardiac events</b>    | <b>9</b>          | <b>3,0</b>  | <b>5</b>           | <b>3,6</b>  | <b>1</b>           | <b>0,9</b>  |           |     |              |    |           |     |        |     |      |    |         |     |
| Cardiac arrhythmia                    | 4                 | 1,3         | 2                  | 1,4         | 1                  | 0,9         | 7         | 100 | 0            | 0  | 0         | 0   | 0      | 0   | 0    | 0  | 0       | 0   |
| Cardiac valvular problem              | 1                 | 0,3         | 0                  | 0,0         | 0                  | 0,0         | 1         | 100 | 0            | 0  | 0         | 0   | 0      | 0   | 0    | 0  | 0       | 0   |
| Congestive heart failure              | 4                 | 1,3         | 2                  | 1,4         | 0                  | 0,0         | 6         | 86  | 0            | 0  | 1         | 14  | 0      | 0   | 0    | 0  | 0       | 0   |
| Symptomatic QT prolongation           | 0                 | 0,0         | 1                  | 0,7         | 0                  | 0,0         | 0         | 0   | 0            | 0  | 1         | 100 | 0      | 0   | 0    | 0  | 0       | 0   |
| <b>Neurological</b>                   | <b>5</b>          | <b>1,6</b>  | <b>6</b>           | <b>4,3</b>  | <b>3</b>           | <b>2,6</b>  |           |     |              |    |           |     |        |     |      |    |         |     |
| Headache                              | 2                 | 0,7         | 3                  | 2,2         | 3                  | 2,6         | 0         | 0   | 0            | 0  | 3         | 38  | 5      | 63  | 0    | 0  | 0       | 0   |
| Dizziness                             | 2                 | 0,7         | 1                  | 0,7         | 0                  | 0,0         | 0         | 0   | 1            | 33 | 1         | 33  | 1      | 33  | 0    | 0  | 0       | 0   |
| Polyneuropathy                        | 1                 | 0,3         | 2                  | 1,4         | 0                  | 0,0         | 1         | 33  | 2            | 67 | 0         | 0   | 0      | 0   | 0    | 0  | 0       | 0   |
| <b>Other</b>                          |                   |             |                    |             |                    |             |           |     |              |    |           |     |        |     |      |    |         |     |
| Rash                                  | 34                | 11,1        | 10                 | 7,2         | 4                  | 3,4         | 6         | 12  | 2            | 4  | 11        | 22  | 30     | 61  | 0    | 0  | 0       | 0   |
| Infection                             | 33                | 10,8        | 7                  | 5,0         | 7                  | 6,0         | 40        | 82  | 4            | 8  | 5         | 10  | 0      | 0   | 0    | 0  | 0       | 0   |
| Fatigue                               | 25                | 8,2         | 8                  | 5,8         | 6                  | 5,2         | 8         | 20  | 2            | 5  | 14        | 35  | 16     | 40  | 0    | 0  | 0       | 0   |
| Bleeding                              | 5                 | 1,6         | 0                  | 0,0         | 3                  | 2,6         | 5         | 63  | 0            | 0  | 0         | 0   | 1      | 13  | 0    | 0  | 2       | 25  |
| Anorexia                              | 4                 | 1,3         | 0                  | 0,0         | 3                  | 2,6         | 0         | 0   | 2            | 29 | 2         | 29  | 2      | 29  | 1    | 14 | 0       | 0   |
| Second malignancies                   | 7                 | 2,3         | 2                  | 1,4         | 1                  | 0,9         | 10        | 100 | 0            | 0  | 0         | 0   | 0      | 0   | 0    | 0  | 0       | 0   |
| Pruritus                              | 4                 | 1,3         | 3                  | 2,2         | 1                  | 0,9         | 0         | 0   | 1            | 13 | 2         | 25  | 4      | 50  | 1    | 13 | 0       | 0   |
| Surgical intervention                 | 1                 | 0,3         | 1                  | 0,7         | 2                  | 1,7         | 3         | 75  | 0            | 0  | 0         | 0   | 0      | 0   | 0    | 0  | 1       | 25  |
| Alopecia                              | 0                 | 0,0         | 2                  | 1,4         | 0                  | 0,0         | 0         | 0   | 0            | 0  | 2         | 100 | 0      | 0   | 0    | 0  | 0       | 0   |
| Mucositis                             | 4                 | 1,3         | 0                  | 0,0         | 0                  | 0,0         | 0         | 0   | 1            | 25 | 1         | 25  | 2      | 50  | 0    | 0  | 0       | 0   |
| Hypertension                          | 0                 | 0,0         | 1                  | 0,7         | 1                  | 0,9         | 1         | 50  | 0            | 0  | 0         | 0   | 1      | 50  | 0    | 0  | 0       | 0   |
| Raynaud phenomonom                    | 0                 | 0,0         | 0                  | 0,0         | 1                  | 0,9         | 0         | 0   | 0            | 0  | 0         | 0   | 1      | 100 | 0    | 0  | 0       | 0   |
| Depression                            | 0                 | 0,0         | 0                  | 0,0         | 1                  | 0,9         | 0         | 0   | 0            | 0  | 0         | 0   | 0      | 0   | 0    | 0  | 1       | 100 |
| Gynaecomasty                          | 2                 | 0,7         | 0                  | 0,0         | 0                  | 0,0         | 0         | 0   | 0            | 0  | 0         | 0   | 2      | 100 | 0    | 0  | 0       | 0   |
| Allergic reaction                     | 2                 | 0,7         | 0                  | 0,0         | 0                  | 0,0         | 1         | 50  | 0            | 0  | 0         | 0   | 1      | 50  | 0    | 0  | 0       | 0   |
| Diabetes mellitus                     | 0                 | 0,0         | 1                  | 0,7         | 0                  | 0,0         | 1         | 100 | 0            | 0  | 0         | 0   | 0      | 0   | 0    | 0  | 0       | 0   |
| Insomnia                              | 1                 | 0,3         | 0                  | 0,0         | 0                  | 0,0         | 0         | 0   | 0            | 0  | 0         | 0   | 1      | 100 | 0    | 0  | 0       | 0   |

\*Cytopenia ≥ CTC grade 3 and/or requiring adjustment of treatment

## Supplementary figures

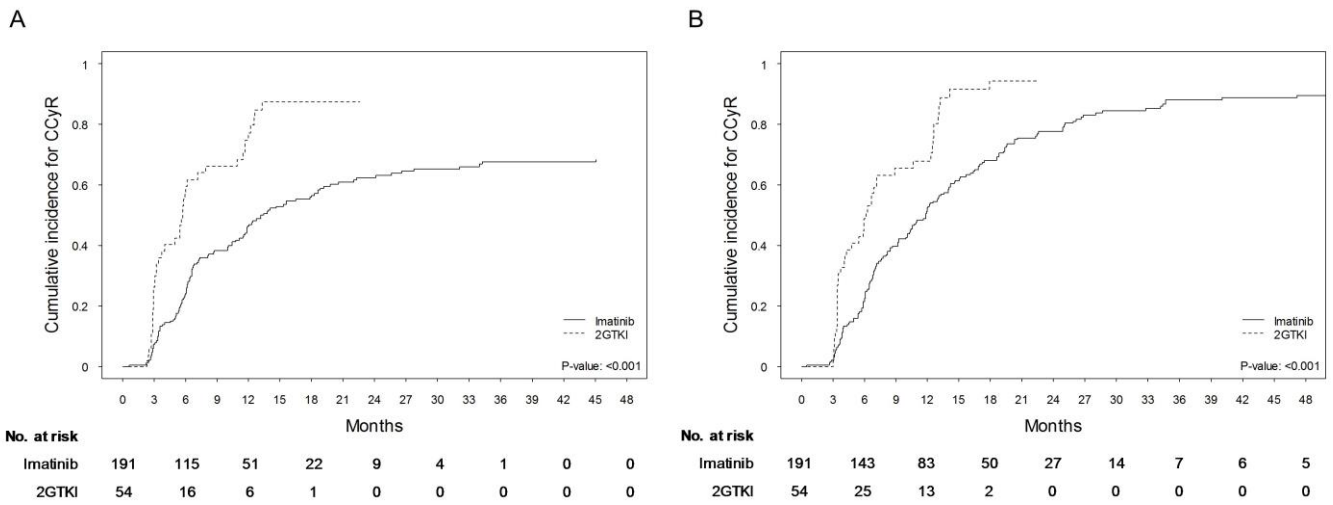

**SI figure S1.** CCyR achievement on frontline imatinib and 2GTKIs

- Cumulative incidence of CCyR on initial treatment
- Cumulative incidence of overall CCyR rate (including switch)

Abbreviations: CCyR, complete cytogenetic response, 2GTKIs, second generation tyrosine kinase inhibitors.

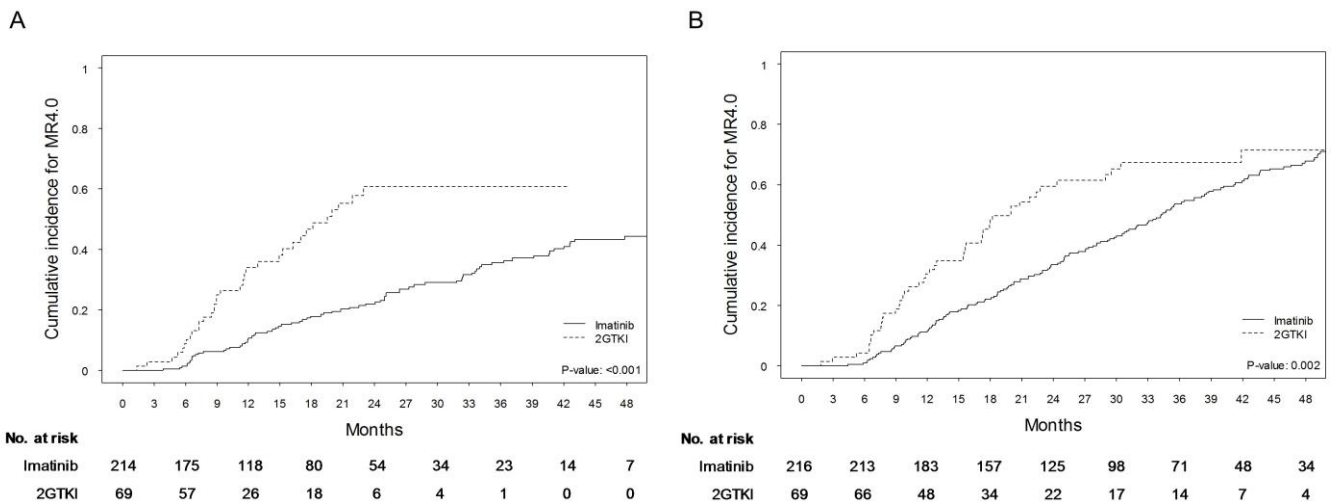

**SI figure S2.** MR<sup>4.0</sup> achievement on frontline imatinib and 2GTKIs

- Cumulative incidence of MR<sup>4.0</sup> on initial treatment
- Cumulative incidence of overall MR<sup>4.0</sup> rate (including switch)

Abbreviations: MR<sup>4.0</sup>, BCR-ABL1 0.01% on international scale, 2GTKIs, second generation tyrosine kinase inhibitors.

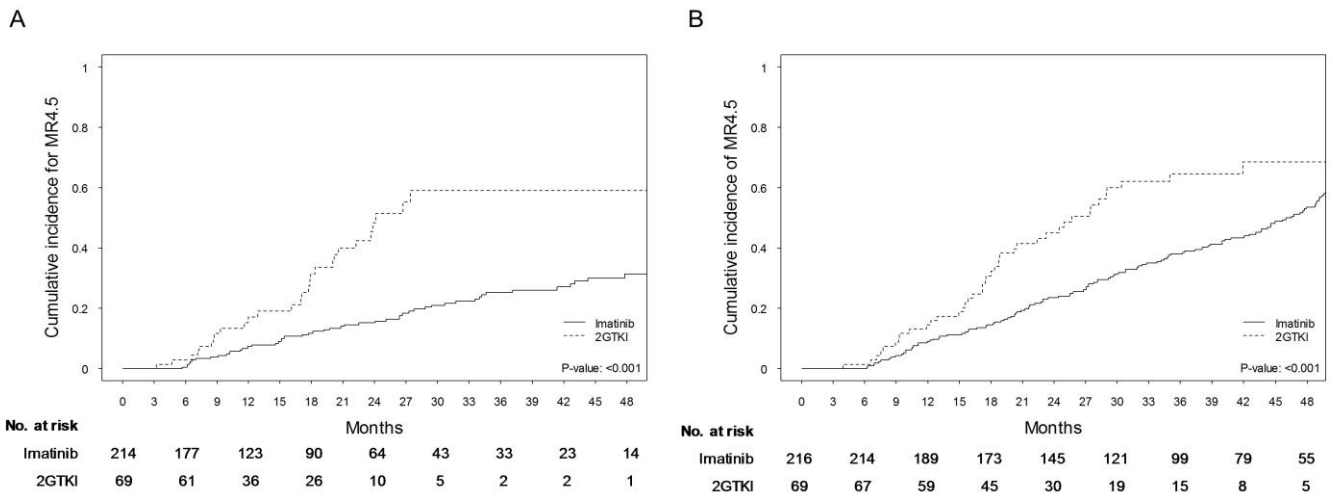

**SI figure S3.** MR<sup>4.5</sup> achievement on frontline imatinib and 2GTKIs

- Cumulative incidence of MR<sup>4.5</sup> on initial treatment
- Cumulative incidence of overall MR<sup>4.5</sup> rate (including switch)

Abbreviations: MR<sup>4.5</sup>, BCR-ABL1 0.032% on international scale, 2GTKIs, second generation tyrosine kinase inhibitors.

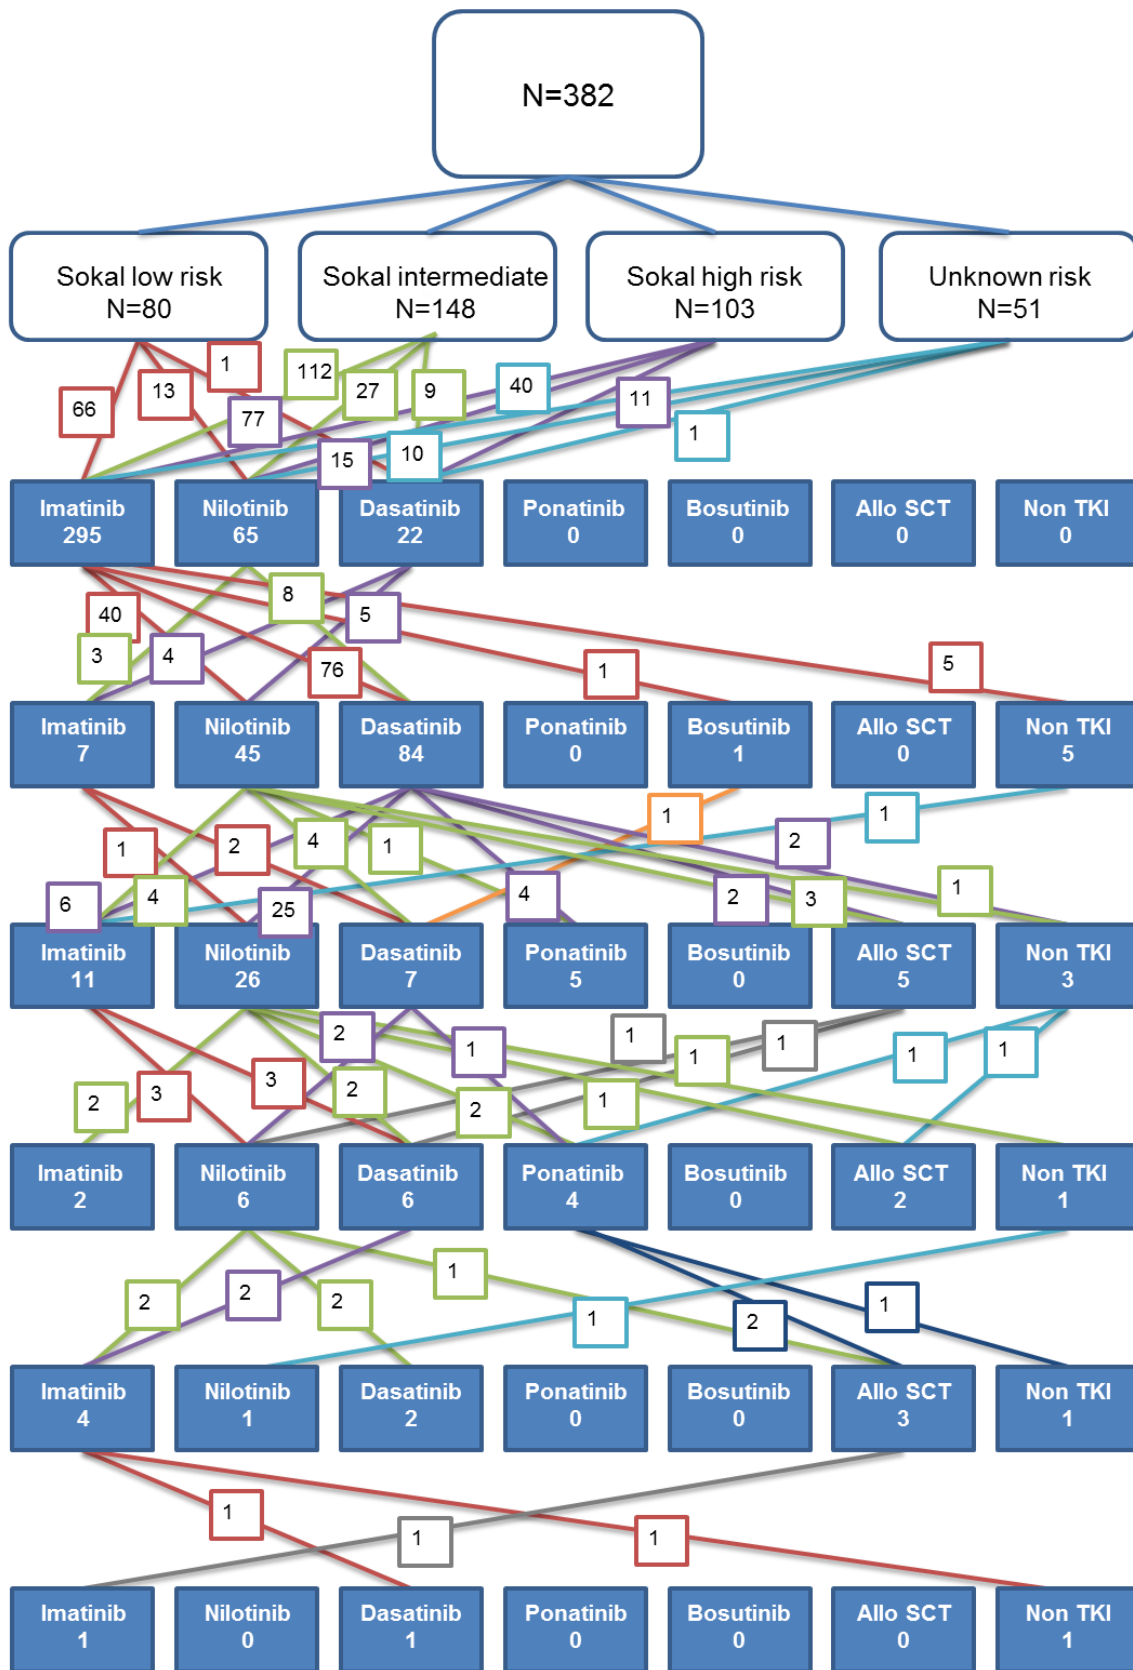

**SI figure S4.** Treatment lines and patterns

Treatment patterns for 382 CML patients in chronic phase at diagnosis treated with a first line TKI

Abbreviations: Allo SCT, allogeneic stem cell transplantation
