# Supplementary material for: Treatment outcome in a population-based, ‘real-world’ cohort of patients with chronic myeloid leukemia
Source: PubMed Central journal article supplement — Haematologica. 2017 Aug 31;102(11):1842–9. doi: 10.3324/haematol.2017.174953 (PMC5664388; doi:10.3324/haematol.2017.174953), 2017-11

# In a 'real-world' setting the long-term outcome of patients treated with TKI is excellent and a third of the patients met the conditions for an attempt to stop TKI therapy

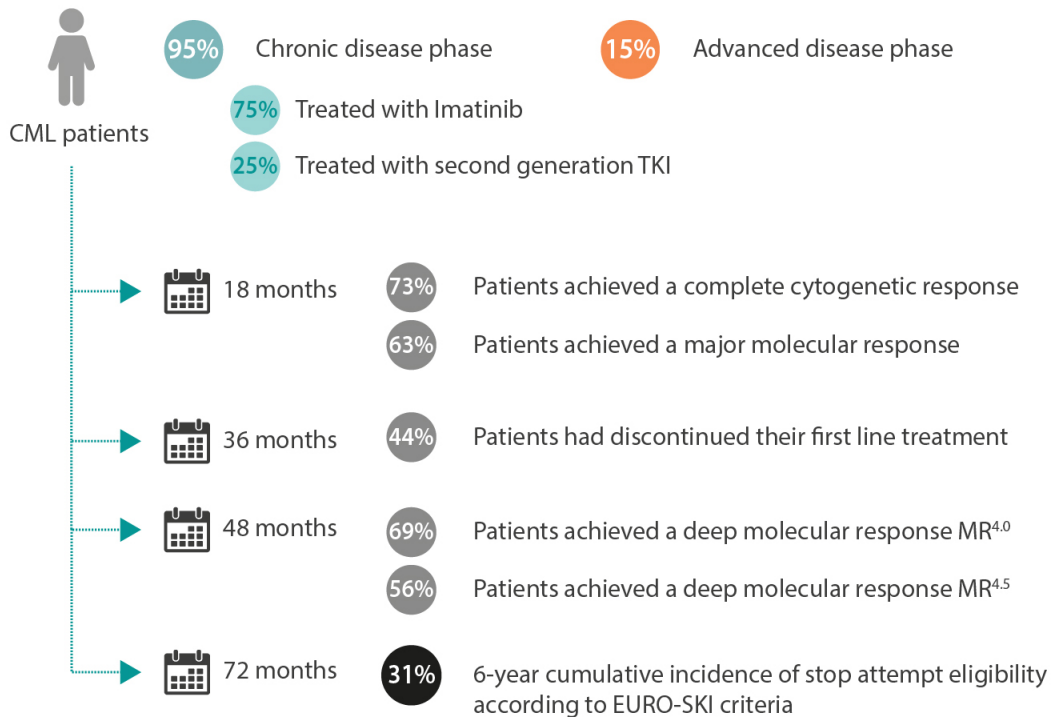

Supplement: HAEMATOL_2017_174953.Geelen.pdf [file HAEMATOL_2017_174953.Geelen.pdf]
